# Supplementary material
Source: PubMed Central journal article supplement (PMC7902340)
Supplement: NIHMS1638428-supplement-cpt2079-sup-0001-Supinfo.pdf [file NIHMS1638428-supplement-cpt2079-sup-0001-Supinfo.pdf]

**SUPPLEMENTARY MATERIALS**

**Table S1.** Genes, variants, and alleles included on the Vanderbilt University Medical Center pharmacogenomic panel test as of September 2020. For each gene, alleles are assigned \*1 if all variant alleles are absent.

| Gene                       | Variants                                                                                                                                                                    | Alleles                                                       |
|----------------------------|-----------------------------------------------------------------------------------------------------------------------------------------------------------------------------|---------------------------------------------------------------|
| <i>CYP2C9</i>              | rs1799853, rs1057910, rs9332131, rs7900194, rs28371685, rs28371686                                                                                                          | *1, *2, *3, *5, *6, *8, *11                                   |
| <i>CYP2C19</i>             | rs12248560, rs4244285, rs4986893, rs28399504, rs72552267, rs41291556                                                                                                        | *1, *2, *3, *4, *6, *8, *17                                   |
| <i>CYP2D6</i> <sup>†</sup> | rs28371706, rs16947, rs59421388, rs1080985, rs35742686, rs3892097, rs1065852, rs28371725, rs5030655, rs5030867, rs5030656, rs5030865(T), rs5030865(A), rs1135840, rs5758550 | *1, *2, *2A, *3, *4, *6, *7, *8, *9, *10A, *14, *17, *29, *41 |
| <i>CYP3A5</i>              | rs776746, rs10264272, rs41303343                                                                                                                                            | *1, *3, *6, *7                                                |
| <i>CYP4F2</i>              | rs2108622                                                                                                                                                                   | *1, *3                                                        |
| <i>DPYD</i>                | rs3918290, rs56038477, rs67376798, rs115232898, rs55886062                                                                                                                  | *1, *2A, 1236G>A, 2846A>T, 557A->G, *13                       |
| <i>NUDT15</i>              | rs116855232, rs186364861                                                                                                                                                    | *1, *2, *3, *5                                                |
| <i>SLCO1B1</i>             | rs4149056                                                                                                                                                                   | *1, *5                                                        |
| <i>TPMT</i> <sup>‡</sup>   | rs1800462, rs1800460, rs1142345, rs1800584, rs56161402                                                                                                                      | *1, *2, *3B, *3C, *4, *8                                      |
| <i>VKORC1</i>              | rs9923231                                                                                                                                                                   | -1639G>A                                                      |

<sup>†</sup>*CYP2D6* copy number is determined by a separate assay; <sup>‡</sup>If variants rs1800460 and rs1142345 are both present, \*3A allele is presumed, but cannot rule out \*3B/\*3C compound heterozygosity.

**Table S2.** CPIC guidance updates as of June 2020

| <b>Drug Gene Interaction</b>                                                 | <b>Publication Date</b> | <b>Variants Updates</b> | <b>Guideline Updates</b> | <b>Examples of Variants and/or Recommendation Updated</b>                                                                                                                          |
|------------------------------------------------------------------------------|-------------------------|-------------------------|--------------------------|------------------------------------------------------------------------------------------------------------------------------------------------------------------------------------|
| Ivacaftor and <i>CFTR</i>                                                    | Mar 2014                | 3                       | 1                        | Addition of <i>CFTR</i> variants; G1244E, G1349D, G178R, G551S, etc.                                                                                                               |
| Clopidogrel and <i>CYP2C19</i>                                               | Sep 2013                | 0                       | 1                        | Focused on patients with ACS undergoing PCI, refined recommendations for variant and novel <i>CYP2C19</i> alleles beyond *2                                                        |
| Warfarin and <i>CYP2C9/VKORC1</i>                                            | Dec 2016                | 0                       | 2                        | Incorporated <i>CYP4F2</i> , rs12777823 and ancestry into dosing recommendation                                                                                                    |
| Atomoxetine and <i>CYP2D6</i>                                                | Feb 2019                | 0                       | 1                        | <i>CYP2D6</i> genotype to phenotype translation changes                                                                                                                            |
| Codeine and <i>CYP2D6</i>                                                    | Apr 2014                | 0                       | 2                        | <i>CYP2D6</i> genotype to phenotype translation changes                                                                                                                            |
| Ondansetron/Tropisetron and <i>CYP2D6</i>                                    | Dec 2016                | 0                       | 1                        | <i>CYP2D6</i> genotype to phenotype translation changes                                                                                                                            |
| Tamoxifen and <i>CYP2D6</i>                                                  | Jan 2018                | 0                       | 1                        | <i>CYP2D6</i> genotype to phenotype translation changes                                                                                                                            |
| Selective Serotonin Reuptake Inhibitors and <i>CYP2D6</i> and <i>CYP2C19</i> | Aug 2015                | 0                       | 1                        | <i>CYP2D6</i> genotype to phenotype translation changes                                                                                                                            |
| Tricyclic Antidepressants and <i>CYP2D6</i> and <i>CYP2C19</i>               | Dec 2016                | 0                       | 2                        | <i>CYP2D6</i> genotype to phenotype translation changes                                                                                                                            |
| Fluoropyrimidines and <i>DPYD</i>                                            | Oct 2017                | 3                       | 2                        | Refined dose reduction recommendation                                                                                                                                              |
| Rasburicase and <i>G6PD</i>                                                  | Aug 2014                | 1                       | 0                        | New interpretation of <i>G6PD</i> A variant as IV/normal function (previously II-IV/Deficient-normal function)                                                                     |
| Carbamazepine/Oxcarbazepine and <i>HLA</i>                                   | Dec 2017                | 0                       | 1                        | Increased scope of the recommendations expanded to include the use of carbamazepine and oxcarbazepine based on <i>HLA-A</i> *31:01 and <i>HLA-B</i> *15:02 genotypes, respectively |
| Simvastatin and <i>SLCO1B1</i>                                               | Oct 2014                | 0                       | 1                        | Included brief review on <i>SLCO1B1</i> genotype and risk of myopathy for other statins                                                                                            |
| Thiopurines and <i>TPMT/NUDT15</i>                                           | Nov 2018                | 1                       | 2                        | Additional recommendations for <i>TPMT</i> and <i>NUDT15</i> indeterminate phenotypes and updated <i>NUDT15</i> *9 function status from “uncertain function” to “no function”      |
| Atazanavir and <i>UGT1A1</i>                                                 | Sep 2015                | 2                       | 0                        | Additional information on <i>UGT1A1</i> *80 allele with very high linkage disequilibrium with *28 and *37                                                                          |

ACS=acute coronary syndrome, PCI= percutaneous coronary intervention

**Figure S1.** PREDICT's Pharmacogenomics interpretation report, which includes results, interpretations, and recommendations. Evidence links are included to provide additional resources for clinical guidance, including primary literature. A separate laboratory report provides the assay methodology, variants tested and any relevant comments that may be unique to the patient from the reviewing molecular-diagnostics professional. Image is copyright of Epic Systems Corporation and used with permission.

| <b>Pharmacogenomics Pnl (Predict) Report</b>                                                                                                                                                                                                             |                        | Order: 155405808 |
|----------------------------------------------------------------------------------------------------------------------------------------------------------------------------------------------------------------------------------------------------------|------------------------|------------------|
| Collected: 1/6/2020 02:33 Status: Final result Visible to patient: Yes (My Health at Vanderbilt)                                                                                                                                                         |                        |                  |
| <b>Component</b>                                                                                                                                                                                                                                         |                        |                  |
| <b>TPMT-Thiopurines-interpretation</b>                                                                                                                                                                                                                   | normal metabolizer     |                  |
| <b>TPMT-Thiopurines-result</b>                                                                                                                                                                                                                           | *1/*1                  |                  |
| Comment: THIOPURINES interpretation: Normal metabolizer - Normal myelotoxicity risk. Visit <a href="https://www.mydruggenome.org/dgi/thiopurine">https://www.mydruggenome.org/dgi/thiopurine</a> for more info.                                          |                        |                  |
| <b>SLCO1B1-Simvastatin-interpretation</b>                                                                                                                                                                                                                | normal risk            |                  |
| <b>SLCO1B1-Simvastatin-result</b>                                                                                                                                                                                                                        | *1/*1                  |                  |
| Comment: SIMVASTATIN interpretation: Normal myopathy risk (limited pediatric evidence). Visit <a href="https://www.mydruggenome.org/dgi/simvastatin">https://www.mydruggenome.org/dgi/simvastatin</a> for more info.                                     |                        |                  |
| <b>CYP3A5-Tacrolimus-interpretation</b>                                                                                                                                                                                                                  | intermediate responder |                  |
| <b>CYP3A5-Tacrolimus-result</b>                                                                                                                                                                                                                          | *1/*3                  |                  |
| Comment: TACROLIMUS interpretation: Intermediate metabolizer - Increased starting dose may be required. Visit <a href="https://www.mydruggenome.org/dgi/tacrolimus">https://www.mydruggenome.org/dgi/tacrolimus</a> for more info.                       |                        |                  |
| <b>CYP2D6-Codeine-interpretation</b>                                                                                                                                                                                                                     | normal metabolizer     |                  |
| <b>CYP2D6-Codeine-result</b>                                                                                                                                                                                                                             | (*1/*2A)2N             |                  |
| Comment: codeine interpretation: Normal metabolizer - Standard dosing recommended. Visit <a href="https://www.mydruggenome.org/dgi/codeine">https://www.mydruggenome.org/dgi/codeine</a> for more info.                                                  |                        |                  |
| <b>CYP2D6-Tramadol-interpretation</b>                                                                                                                                                                                                                    | normal metabolizer     |                  |
| <b>CYP2D6-Tramadol-result</b>                                                                                                                                                                                                                            | (*1/*2A)2N             |                  |
| Comment: TRAMADOL interpretation: Normal metabolizer - Standard dosing recommended. Visit <a href="https://www.mydruggenome.org/dgi/tramadol">https://www.mydruggenome.org/dgi/tramadol</a> for more info.                                               |                        |                  |
| <b>CYP2C19-Clopidogrel-interpretation</b>                                                                                                                                                                                                                | rapid metabolizer      |                  |
| <b>CYP2C19-Clopidogrel-result</b>                                                                                                                                                                                                                        | *1/*17                 |                  |
| Comment: CLOPIDOGREL interpretation: Rapid metabolizer - No decreased anti-platelet effect (limited pediatric evidence). Visit <a href="https://www.mydruggenome.org/dgi/clopidogrel">https://www.mydruggenome.org/dgi/clopidogrel</a> for more info.    |                        |                  |
| <b>CYP2C19-Voriconazole-interpretation</b>                                                                                                                                                                                                               | rapid metabolizer      |                  |
| <b>CYP2C19-Voriconazole-result</b>                                                                                                                                                                                                                       | *1/*17                 |                  |
| Comment: VORICONAZOLE interpretation: Rapid metabolizer - Risk for non-response. Clinical pharmacist consult recommended. Visit <a href="https://www.mydruggenome.org/dgi/voriconazole">https://www.mydruggenome.org/dgi/voriconazole</a> for more info. |                        |                  |

© 2020 Epic Systems Corporation. Used with permission.

**Figure S2.** PREDICT Genomic Indicators before and after system updates. Genomic Indicators are used to deliver PGx results to pharmacists and clinicians within the Epic EHR. A copy of the PREDICT Genomic Indicators from 2018 (a) and 2020 (b) are shown to demonstrate programmatic improvements in the incorporation of clinical support into the EHR. Images are copyright of Epic Systems Corporation and used with permission.

(a)

**Genomic Indicators in 2018**

**Genomic Indicators**

Search for indicator  [Add](#)

| Indicator                                                                                                                                                                                                                                                                                                                                                                                                                                                                                                                                                                                                                                                                                                                                                                                                                                 | Type | Updated      |
|-------------------------------------------------------------------------------------------------------------------------------------------------------------------------------------------------------------------------------------------------------------------------------------------------------------------------------------------------------------------------------------------------------------------------------------------------------------------------------------------------------------------------------------------------------------------------------------------------------------------------------------------------------------------------------------------------------------------------------------------------------------------------------------------------------------------------------------------|------|--------------|
| DGI1:Clopidogrel Sensitivity intermediate metabolizer<br><small>Overview</small> Patient indicator generated automatically on 6/23/2017 for: Result: CYP2C19-CLOPIDOGREL-INTERPRETATION Value: intermediate metabolizer<br><small>Linked Results</small><br><a href="#">View linked results</a><br><small>About This Indicator</small><br>This DGI pertains to the interaction between the CYP2C19 gene and clopidogrel. Extensive literature and FDA warning labels indicate patients with genetically reduced CYP2C19 function demonstrate lower systemic exposure to the active metabolite of clopidogrel, diminished antiplatelet responses, and generally exhibit higher cardiovascular event rates following a coronary stent procedure than do patients with normal CYP2C19 function.<br>References: <a href="#">Evidence Link</a> | Drug | 6/23/2017 by |
| DGI3:Simvastatin Sensitivity high risk<br><small>Overview</small> Patient indicator generated automatically on 6/23/2017 for: Result: SLCO1B1-SIMVASTATIN-INTERPRETATION Value: high risk<br><small>Linked Results</small><br><a href="#">View linked results</a><br><small>About This Indicator</small><br>This DGI pertains to the interaction between the SLCO1B1 gene and simvastatin. Extensive literature and FDA warning labels indicate increased risk for myopathy in patients with a specific genetic differences on the SLCO1B1 gene.<br>References: <a href="#">Evidence Link</a>                                                                                                                                                                                                                                             | Drug | 6/23/2017 by |
| DGI2:Warfarin Sensitivity vkorc1 a/g; cyp2c9 *1/*2<br><small>Overview</small> Patient indicator generated automatically on 6/23/2017 for: Result: VKORC1/CYP2C9-WARFARIN-INTERPRETATION Value: vkorc1 a/g; cyp2c9 *1/*2<br><small>Linked Results</small><br><a href="#">View linked results</a>                                                                                                                                                                                                                                                                                                                                                                                                                                                                                                                                           | Drug | 6/23/2017 by |

© 2020 Epic Systems Corporation. Used with permission.

(b)

**Genomic Indicators in 2020**

**Genomic Indicators [Read-Only]** On

**List is currently read-only.**  
 You do not have the security to edit genomic indicators. Most options within this activity are not available.

| Name                                                                                                                                                                   | Type | Last Updated                     | Share with Patient?                 | Linked Results                 |
|------------------------------------------------------------------------------------------------------------------------------------------------------------------------|------|----------------------------------|-------------------------------------|--------------------------------|
| <b>Clopidogrel</b><br>Interpretation: Rapid metabolizer                                                                                                                | Drug | 1/9/2020 by User, System Default | <input checked="" type="checkbox"/> | <a href="#">Linked Results</a> |
| <b>Codeine</b><br>Interpretation: Normal metabolizer                                                                                                                   | Drug | 1/9/2020 by User, System Default | <input checked="" type="checkbox"/> | <a href="#">Linked Results</a> |
| <b>Simvastatin</b><br>Interpretation: Normal risk                                                                                                                      | Drug | 1/9/2020 by User, System Default | <input checked="" type="checkbox"/> | <a href="#">Linked Results</a> |
| <b>Tacrolimus</b><br>Interpretation: Intermediate metabolizer                                                                                                          | Drug | 1/9/2020 by User, System Default | <input checked="" type="checkbox"/> | <a href="#">Linked Results</a> |
| <b>Thiopurines</b><br>Interpretation: Normal metabolizer<br>No increased myelotoxicity risk. Standard dosing recommended.<br>References: <a href="#">Evidence Link</a> | Drug | 1/9/2020 by User, System Default | <input checked="" type="checkbox"/> | <a href="#">Linked Results</a> |
| <b>Voriconazole</b><br>Interpretation: Rapid metabolizer                                                                                                               | Drug | 1/9/2020 by User, System Default | <input checked="" type="checkbox"/> | <a href="#">Linked Results</a> |
| <b>Warfarin</b><br>Interpretation: Normal Responder                                                                                                                    | Drug | 1/9/2020 by User, System Default | <input checked="" type="checkbox"/> | <a href="#">Linked Results</a> |

© 2020 Epic Systems Corporation. Used with permission.

**Figure S3.** Comparing CYP2D6 genotype-to-phenotype resolution before and after CPIC guidelines.

(a) Previous CPIC genotype-to-phenotype guidance permitted alleles to be scored as 0, 0.5, 1, and 2+ (for gene duplication). The translation of these activity scores meant poor metabolizers (PM) were scored 0, intermediate metabolizers (IM) were 0.5, normal metabolizers (NM) ranged from 1-2, and ultrarapid metabolizers (UM) were scored as >2.

(b) The new CPIC CYP2D6 genotype-to-phenotype guidance now scores alleles as 0, 0.25, 0.5, 1, and 2+. These new activity scores facilitate greater phenotypic resolution wherein PMs were scored 0, IMs range from 0.25-1, NMs range from 1.25-2.25, and UMs are >2.25. Collectively, the revised system captures more genotype-to-phenotype nuance, which is represented by greater activity score coverage in the figure (the activity score spectrum traversing the two panels). Figure adapted from Caudle et al., 2020.<sup>1</sup>

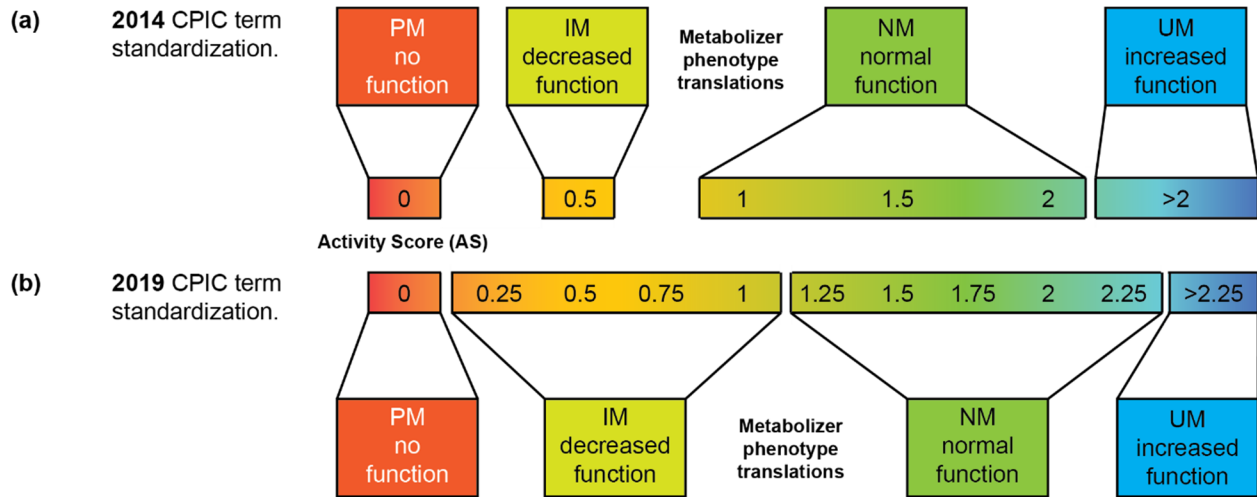

**Reference**

1. Caudle, K. E. et al. Standardizing CYP2D6 Genotype to Phenotype Translation: Consensus Recommendations from the Clinical Pharmacogenetics Implementation Consortium and Dutch Pharmacogenetics Working Group. *Clin Transl Sci* 13, 116–124 (2020).
